# Supplementary material
Source: HighWire-hosted journal article supplement (https://bmjopen.bmj.com/content/11/2/e041656)
Supplement: inline-supplementary-material-2 [file inline-supplementary-material-2.pdf]

University Hospital Southampton   
NHS Foundation Trust

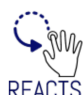

 Arthritis Research UK  
 MRC Medical Research Council  
centre for musculoskeletal health & work

UNIVERSITY OF  
**Southampton**

Site

|  |  |  |
|--|--|--|
|  |  |  |
|--|--|--|

Please fill in today's date

|   |   |   |   |   |   |
|---|---|---|---|---|---|
|   |   |   |   |   |   |
| d | d | m | m | y | y |

## Before Your Carpal Tunnel Release Surgery

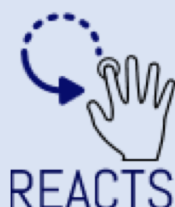

## Return to Employment After Carpal Tunnel Release Surgery (REACTS)

**In@mrc.soton.ac.uk | 023 8077 7624**

Arthritis Research UK – MRC Centre for Musculoskeletal Health and Work  
MRC Lifecourse Epidemiology Unit, University of Southampton  
Southampton General Hospital (MP 95), SO16 6YD

IRAS reference: 209840



**CONSENT FORM** (IRAS reference: 209840)

You should complete this form after you have read the Participant Information Sheet.

**REACTS: Return to employment after carpal tunnel release surgery**

Thank you for considering taking part in this research. If you have any questions arising from the Participant Information Sheet, please ask the research team before you decide whether to take part.

**Please initial the boxes if you agree with each statement**

1. I have read the Participant Information Sheet (version 2.0; 06.12.16) and have had the opportunity to ask questions about the study.
2. I meet the criteria for being involved in this study:
  - Aged over 18 and referred for carpal tunnel release surgery
  - Routinely work in paid employment for at least 20 hours per week
  - Plan to return to work after carpal tunnel release surgery
  - Have not previously had carpal tunnel release surgery on either hand
  - Have not previously had a serious injury to the same wrist/hand that will have the carpal tunnel release operation
3. I agree to take part in this research and agree for my data to be used for the purposes explained in the Participant Information Sheet (version 2.0; 06.12.16). I understand that this information will be handled in accordance with the terms of the UK Data Protection Act 1998. 
  - a. I agree for the REACTS research team to access pre-operative test results concerning my hand and wrist symptoms. No other information will be accessed.
  - b. I agree for the REACTS research team to access my carpal tunnel release surgical record. No other information will be accessed.
4. I understand that if I decide at any time during the research that I no longer wish to take part, I can notify the researchers and withdraw from the study immediately, without giving a reason. If I do, I understand that I can ask for any contribution I have already made to be removed from the study, up to the time when I have completed the final questionnaire.

Signature \_\_\_\_\_ Date \_\_\_\_ / \_\_\_\_ / \_\_\_\_

Name \_\_\_\_\_ Phone \_\_\_\_\_  
(please print) (only to be used if we lose touch)

Postal address \_\_\_\_\_

Email address \_\_\_\_\_  
(please print)

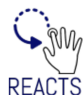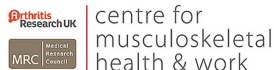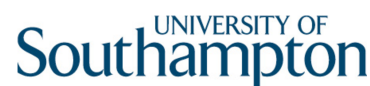

## ADDITIONAL QUESTIONS

*Please circle one response for each question*

I prefer to receive the next two questionnaires by **Post** **Email** **Don't mind**

I prefer to receive correspondence about the study by **Post** **Email** **Don't mind**

I would like to be notified of the findings from this research **Yes** **No**

I am happy to be contacted about the next stage of the research, which will involve a one-off discussion with the lead researcher **Yes** **No**

I am happy to be contacted about other studies related to this research **Yes** **No**

When the research team receives your completed questionnaire and consent form, we will sign it below and return a copy to you for your records.

Researcher signature \_\_\_\_\_ Date \_\_\_\_ / \_\_\_\_ / \_\_\_\_

Researcher name \_\_\_\_\_

University of Southampton research supervisors:

Professor Karen Walker-Bone | Professor Jo Adams | Professor David Warwick

## SECTION A: BACKGROUND

### 1 What is your date of birth?

|   |   |   |   |   |   |
|---|---|---|---|---|---|
|   |   |   |   |   |   |
| d | d | m | m | y | y |

### 2 Are you:

Male       Female       Other

### 3 Are you:

Right handed       Left handed       Both

### 4 Do you routinely carry out paid work for 20 hours or longer in a given week?

Yes       No

*If no, thank you for your interest in our study, however, we are only looking for individuals who carry out paid work for at least 20 hours per week. You **do not** need to complete the rest of the questionnaire, but please return it using the pre-paid envelope provided.*

### 5 When do you expect to have your carpal tunnel surgery?

Please enter the exact date if known, or provide the approximate month and year if unsure.

|   |   |   |   |   |   |
|---|---|---|---|---|---|
|   |   |   |   |   |   |
| d | d | m | m | y | y |

### 6 Which hand will be operated on?

If both hands please answer Question 6.1; if one hand, please move on to Question 7.

Right       Left       Both

#### 6.1 If both hands, which side will be operated on first?

Right       Left       Both sides operated  
on the same day       Unsure

### 7 Do you have access to an occupational health service through your place of work?

Yes       No       Unsure

### 8 Do you expect to take any time off work following your surgery?

If yes, please answer Question 8.1; if no, please move on to Question 9.

Yes       No       Unsure

#### 8.1 If you do expect to take time off work, how long do you expect to take?

Please complete using days, weeks or months; whichever applies.

Days       Weeks       Months

## SECTION A: BACKGROUND

### 9 Have you been given any information about your operation?

If yes, please answer Question 9.1; if no, please move on to Question 10.

Yes  No

#### 9.1 If yes, who provided this information? Please tick all that apply.

- |                                                                           |                                                                 |
|---------------------------------------------------------------------------|-----------------------------------------------------------------|
| a) Your surgeon or a member of the surgical team <input type="checkbox"/> | f) Occupational health nurse or doctor <input type="checkbox"/> |
| b) Hospital nurse <input type="checkbox"/>                                | g) Employer <input type="checkbox"/>                            |
| c) GP or practice nurse <input type="checkbox"/>                          | h) Friend or family member <input type="checkbox"/>             |
| d) Hand therapist <input type="checkbox"/>                                | i) Internet <input type="checkbox"/>                            |
| e) Physiotherapist or occupational therapist <input type="checkbox"/>     | j) Other ( <i>please specify</i> ) <input type="checkbox"/>     |

### 10 Have you been given any information about returning to work after your surgery?

If yes, please answer the rest of Question 10; if no, please move on to Question 11.

Yes  No

#### 10.1 If yes, who provided this information? Please tick all that apply.

- |                                                                           |                                                                 |
|---------------------------------------------------------------------------|-----------------------------------------------------------------|
| a) Your surgeon or a member of the surgical team <input type="checkbox"/> | f) Occupational health nurse or doctor <input type="checkbox"/> |
| b) Hospital nurse <input type="checkbox"/>                                | g) Employer <input type="checkbox"/>                            |
| c) GP or practice nurse <input type="checkbox"/>                          | h) Friend or family member <input type="checkbox"/>             |
| d) Hand therapist <input type="checkbox"/>                                | i) Internet <input type="checkbox"/>                            |
| e) Physiotherapist or occupational therapist <input type="checkbox"/>     | j) Other ( <i>please specify</i> ) <input type="checkbox"/>     |

#### 10.2 What advice were you given?

If this advice came from more than one source, please indicate who advised what.

.....

.....

.....

.....

.....

.....

.....

.....

.....

.....

## SECTION B: WORK

**12** What is your **MAIN** occupation at the moment (e.g. secretary, teacher, builder etc.)?

**13** And in what industry do you work (e.g. farming, shipyard, car factory, shoe shop, hospital, insurance office etc)?

**14** Which of the following best describes your present work situation for your **MAIN** occupation? Please tick one box.

- |                                                                     |                                                             |
|---------------------------------------------------------------------|-------------------------------------------------------------|
| a) Employed (permanent contract) <input type="checkbox"/>           | d) Self-employed <input type="checkbox"/>                   |
| b) Employed (temporary/renewable contract) <input type="checkbox"/> | e) Other ( <i>please specify</i> ) <input type="checkbox"/> |
| c) Zero hours contract <input type="checkbox"/>                     |                                                             |

**15** On average, how many **hours** per week do you normally work in your main occupation?

hours

**16** On average, how many **days** per week do you normally work in your main occupation?

days

**17** Do you have any other paid work?

If yes, please answer Question 17.1; if no, please move on to Question 18.

Yes  No

**17.1** If yes, on average, how many hours a week do you work in other paid jobs?   hours

**18** Does an average day at work in your **MAIN** job normally involve any of the following? Please tick one box for each question.

- |                                                                                                                             | Yes                      | No                       |
|-----------------------------------------------------------------------------------------------------------------------------|--------------------------|--------------------------|
| a) Piecework in which you are paid according to the number of articles or tasks you or your team make or finish in the day? | <input type="checkbox"/> | <input type="checkbox"/> |
| b) A target number of articles or tasks that you or your team are expected to make or finish in the day?                    | <input type="checkbox"/> | <input type="checkbox"/> |
| c) Payment of a bonus if you make or finish more than an agreed number of articles/tasks in the day?                        | <input type="checkbox"/> | <input type="checkbox"/> |
| d) Working to tight deadlines                                                                                               | <input type="checkbox"/> | <input type="checkbox"/> |
| e) Use of a computer keyboard or mouse for longer than 1 hour in total?                                                     | <input type="checkbox"/> | <input type="checkbox"/> |

## SECTION B: WORK

|                                                                                                                                            | Yes                      | No                       |
|--------------------------------------------------------------------------------------------------------------------------------------------|--------------------------|--------------------------|
| f) Use of a computer keyboard or mouse for longer than 4 hours in total?                                                                   | <input type="checkbox"/> | <input type="checkbox"/> |
| g) Other tasks involving repeated movements of the wrist or fingers for longer than 4 hours in total? <i>(Please indicate which tasks)</i> | <input type="checkbox"/> | <input type="checkbox"/> |
| -----                                                                                                                                      |                          |                          |
| h) Working with a powered tool that makes your hand(s) or arm(s) vibrate (e.g. chain saw, pneumatic drill)?                                | <input type="checkbox"/> | <input type="checkbox"/> |
| i) Working with your hand(s) above shoulder height for longer than 1 hour in total?                                                        | <input type="checkbox"/> | <input type="checkbox"/> |
| j) Lifting or carrying weights of 5 kg (11 lbs) or more in one hand (e.g. a tool bag or heavy briefcase)?                                  | <input type="checkbox"/> | <input type="checkbox"/> |
| k) Lifting or carrying a weight of 10 kg (22 lbs) or more?                                                                                 | <input type="checkbox"/> | <input type="checkbox"/> |
| l) Tasks involving pushing or pulling a heavy weight?                                                                                      | <input type="checkbox"/> | <input type="checkbox"/> |
| m) Working for longer than two hours in total with your neck bent forward?                                                                 | <input type="checkbox"/> | <input type="checkbox"/> |
| n) Working for longer than half an hour in total with your neck twisted e.g. when looking to one side?                                     | <input type="checkbox"/> | <input type="checkbox"/> |
| o) Driving for more than an hour?                                                                                                          | <input type="checkbox"/> | <input type="checkbox"/> |

**19 Do you find your MAIN job demanding on your hands/wrists?**  
Please circle one number, where 0 represents not at all, and 10 represents very much.

**0      1      2      3      4      5      6      7      8      9      10**  
 Not at all Very much

**20 Does your MAIN employer (or boss/colleagues if self-employed) know about your hand/wrist problem?**

If yes, please answer Question 20.1; if no, or not applicable, please move on to Question 21.

Yes       No       N/A self-employed and work alone

**20.1 Is your MAIN employer (or boss/colleagues if self-employed) supportive of your hand/wrist problem?**

Please circle one number, where 0 represents not at all, and 10 represents very much

**0      1      2      3      4      5      6      7      8      9      10**  
 Not at all Very much



## SECTION B: WORK

**21** The following questions refer to how you did in your MAIN job during the **past 4 weeks**.

Please tick one box for each question.

**How much of the time during the past 4 weeks ...**

- |                                                                                                        | Always                   | Often                    | Sometimes                | Rarely                   | Never                    |
|--------------------------------------------------------------------------------------------------------|--------------------------|--------------------------|--------------------------|--------------------------|--------------------------|
| a) Were you unable to do your work because of problems with your hand(s) / wrist(s)?                   | <input type="checkbox"/> | <input type="checkbox"/> | <input type="checkbox"/> | <input type="checkbox"/> | <input type="checkbox"/> |
| b) Did you have to shorten your work day because of problems with your hand(s) / wrists(s)?            | <input type="checkbox"/> | <input type="checkbox"/> | <input type="checkbox"/> | <input type="checkbox"/> | <input type="checkbox"/> |
| c) Did you have to take breaks at work because of problems with your hand(s) / wrists(s)?              | <input type="checkbox"/> | <input type="checkbox"/> | <input type="checkbox"/> | <input type="checkbox"/> | <input type="checkbox"/> |
| d) Did you get less done because of problems with your hand(s) / wrist(s)?                             | <input type="checkbox"/> | <input type="checkbox"/> | <input type="checkbox"/> | <input type="checkbox"/> | <input type="checkbox"/> |
| e) Did you take longer to do the tasks in your work because of problems with your hand(s) / wrists(s)? | <input type="checkbox"/> | <input type="checkbox"/> | <input type="checkbox"/> | <input type="checkbox"/> | <input type="checkbox"/> |

**22** During the **past 4 weeks**, how much time have you missed from your MAIN job for the following reasons?

Please write 0 if you have not missed any time from work during this period. You can answer in days or hours, whichever applies.

- |                                                                  |                                                                                                                 |      |           |                                                                                                                 |       |
|------------------------------------------------------------------|-----------------------------------------------------------------------------------------------------------------|------|-----------|-----------------------------------------------------------------------------------------------------------------|-------|
| a) Time missed because of the problem with your hand(s)/wrist(s) | <input style="width: 20px; height: 20px;" type="text"/> <input style="width: 20px; height: 20px;" type="text"/> | Days | <b>or</b> | <input style="width: 20px; height: 20px;" type="text"/> <input style="width: 20px; height: 20px;" type="text"/> | Hours |
| b) Time missed because of any other problem                      | <input style="width: 20px; height: 20px;" type="text"/> <input style="width: 20px; height: 20px;" type="text"/> | Days | <b>or</b> | <input style="width: 20px; height: 20px;" type="text"/> <input style="width: 20px; height: 20px;" type="text"/> | Hours |

**23** If you fell ill and were off work, how long could you get your normal full pay (excluding bonuses)?

Please tick the option that best represents your MAIN job.

- |                       |                          |                       |                          |
|-----------------------|--------------------------|-----------------------|--------------------------|
| a) Less than one week | <input type="checkbox"/> | d) More than 6 months | <input type="checkbox"/> |
| b) 1 – 4 weeks        | <input type="checkbox"/> | e) Not sure           | <input type="checkbox"/> |
| c) 1 – 6 months       | <input type="checkbox"/> |                       |                          |

**24** How satisfied are you with your MAIN job as a whole, taking everything into consideration? This includes your salary, career possibilities, management, colleagues etc. Please tick one box.

- |                               |                          |                      |                          |
|-------------------------------|--------------------------|----------------------|--------------------------|
| a) Very satisfied             | <input type="checkbox"/> | c) Dissatisfied      | <input type="checkbox"/> |
| b) Satisfied/fairly satisfied | <input type="checkbox"/> | d) Very dissatisfied | <input type="checkbox"/> |

## SECTION C: GENERAL HEALTH

### 25 In general, would you say your health is:

- |                                       |                                  |
|---------------------------------------|----------------------------------|
| a) Excellent <input type="checkbox"/> | d) Fair <input type="checkbox"/> |
| b) Very good <input type="checkbox"/> | e) Poor <input type="checkbox"/> |
| c) Good <input type="checkbox"/>      |                                  |

### 26 What is your height? Please answer in either feet and inches or centimetres.

feet  inches **or**  cms

### 27 What is your weight? Please answer in either stones and pounds or kilograms.

stones  lbs **or**  kgs

### 28 Do you, or have you ever, smoked regularly? Please tick one box.

- |                                                                                             |                                               |
|---------------------------------------------------------------------------------------------|-----------------------------------------------|
| a) I have never smoked regularly <input type="checkbox"/>                                   | c) I regularly smoke <input type="checkbox"/> |
| b) I have smoked in the past, but do not currently smoke regularly <input type="checkbox"/> |                                               |

### 29 The following is a list of common health problems. Please indicate if you currently have, or don't have, the problem listed in part 1. If you have the problem, please answer the corresponding question in part 2.

Please answer all questions in part 1.

| HEALTH PROBLEM                    | PART 1                   |                          | PART 2                         |                          |
|-----------------------------------|--------------------------|--------------------------|--------------------------------|--------------------------|
|                                   | Do you have the problem? |                          | Does it limit your activities? |                          |
|                                   | NO                       | YES                      | NO                             | YES                      |
|                                   | (if yes move to part 2)  |                          |                                |                          |
| a) Heart disease                  | <input type="checkbox"/> | <input type="checkbox"/> | <input type="checkbox"/>       | <input type="checkbox"/> |
| b) High blood pressure            | <input type="checkbox"/> | <input type="checkbox"/> | <input type="checkbox"/>       | <input type="checkbox"/> |
| c) Lung disease                   | <input type="checkbox"/> | <input type="checkbox"/> | <input type="checkbox"/>       | <input type="checkbox"/> |
| d) Diabetes                       | <input type="checkbox"/> | <input type="checkbox"/> | <input type="checkbox"/>       | <input type="checkbox"/> |
| e) Ulcer or stomach disease       | <input type="checkbox"/> | <input type="checkbox"/> | <input type="checkbox"/>       | <input type="checkbox"/> |
| f) Kidney disease                 | <input type="checkbox"/> | <input type="checkbox"/> | <input type="checkbox"/>       | <input type="checkbox"/> |
| g) Liver disease                  | <input type="checkbox"/> | <input type="checkbox"/> | <input type="checkbox"/>       | <input type="checkbox"/> |
| h) Thyroid disease                | <input type="checkbox"/> | <input type="checkbox"/> | <input type="checkbox"/>       | <input type="checkbox"/> |
| i) Anaemia or other blood disease | <input type="checkbox"/> | <input type="checkbox"/> | <input type="checkbox"/>       | <input type="checkbox"/> |
| j) Cancer                         | <input type="checkbox"/> | <input type="checkbox"/> | <input type="checkbox"/>       | <input type="checkbox"/> |

## SECTION C: GENERAL HEALTH

| HEALTH PROBLEM<br>continued... | Do you have the<br>problem? |                                         | Does it limit your<br>activities? |                          |
|--------------------------------|-----------------------------|-----------------------------------------|-----------------------------------|--------------------------|
|                                | NO                          | YES<br><i>(if yes move to part 2)</i> → | NO                                | YES                      |
| k) Depression                  | <input type="checkbox"/>    | <input type="checkbox"/>                | <input type="checkbox"/>          | <input type="checkbox"/> |
| l) Osteoarthritis              | <input type="checkbox"/>    | <input type="checkbox"/>                | <input type="checkbox"/>          | <input type="checkbox"/> |
| m) Back pain                   | <input type="checkbox"/>    | <input type="checkbox"/>                | <input type="checkbox"/>          | <input type="checkbox"/> |
| n) Rheumatoid arthritis        | <input type="checkbox"/>    | <input type="checkbox"/>                | <input type="checkbox"/>          | <input type="checkbox"/> |

**29.1** Please list any other medical problems that have not been mentioned.

|          | Does it limit<br>your activities? |                          |
|----------|-----------------------------------|--------------------------|
|          | NO                                | YES                      |
| o) _____ | <input type="checkbox"/>          | <input type="checkbox"/> |
| p) _____ | <input type="checkbox"/>          | <input type="checkbox"/> |
| q) _____ | <input type="checkbox"/>          | <input type="checkbox"/> |

**30** The following questions are about how you feel and how things have been with you during the **past 4 weeks**. For each question, please give the answer that comes closest to the way you have been feeling. Please tick one box for each row.

| How much of the time during<br>the past 4 weeks ...                    | All of<br>the time       | Most<br>of the<br>time   | A good<br>bit of<br>the time | Some<br>of the<br>time   | A little bit<br>of the<br>time | None of<br>the time      |
|------------------------------------------------------------------------|--------------------------|--------------------------|------------------------------|--------------------------|--------------------------------|--------------------------|
| a) Did you feel full of 'get-up-and-go'?                               | <input type="checkbox"/> | <input type="checkbox"/> | <input type="checkbox"/>     | <input type="checkbox"/> | <input type="checkbox"/>       | <input type="checkbox"/> |
| b) Have you been a very nervous person?                                | <input type="checkbox"/> | <input type="checkbox"/> | <input type="checkbox"/>     | <input type="checkbox"/> | <input type="checkbox"/>       | <input type="checkbox"/> |
| c) Have you felt so down in the dumps that nothing could cheer you up? | <input type="checkbox"/> | <input type="checkbox"/> | <input type="checkbox"/>     | <input type="checkbox"/> | <input type="checkbox"/>       | <input type="checkbox"/> |
| d) Have you felt calm and peaceful?                                    | <input type="checkbox"/> | <input type="checkbox"/> | <input type="checkbox"/>     | <input type="checkbox"/> | <input type="checkbox"/>       | <input type="checkbox"/> |
| e) Did you have a lot of energy?                                       | <input type="checkbox"/> | <input type="checkbox"/> | <input type="checkbox"/>     | <input type="checkbox"/> | <input type="checkbox"/>       | <input type="checkbox"/> |
| f) Have you felt downhearted and blue?                                 | <input type="checkbox"/> | <input type="checkbox"/> | <input type="checkbox"/>     | <input type="checkbox"/> | <input type="checkbox"/>       | <input type="checkbox"/> |
| g) Did you feel worn out?                                              | <input type="checkbox"/> | <input type="checkbox"/> | <input type="checkbox"/>     | <input type="checkbox"/> | <input type="checkbox"/>       | <input type="checkbox"/> |
| h) Have you been a happy person?                                       | <input type="checkbox"/> | <input type="checkbox"/> | <input type="checkbox"/>     | <input type="checkbox"/> | <input type="checkbox"/>       | <input type="checkbox"/> |
| i) Did you feel tired?                                                 | <input type="checkbox"/> | <input type="checkbox"/> | <input type="checkbox"/>     | <input type="checkbox"/> | <input type="checkbox"/>       | <input type="checkbox"/> |

**SECTION C: GENERAL HEALTH**

31

Below is a list of problems that people sometimes have. Please read each one carefully and tick the box that best describes how much that problem has distressed or bothered you during the *past 7 days*, including today?

Please tick one box for each row.

|                                | Not at all               | A little bit             | Moderately               | Quite a bit              | Extremely                |
|--------------------------------|--------------------------|--------------------------|--------------------------|--------------------------|--------------------------|
| a) Faintness or dizziness      | <input type="checkbox"/> | <input type="checkbox"/> | <input type="checkbox"/> | <input type="checkbox"/> | <input type="checkbox"/> |
| b) Pains in the heart or chest | <input type="checkbox"/> | <input type="checkbox"/> | <input type="checkbox"/> | <input type="checkbox"/> | <input type="checkbox"/> |
| c) Nausea or upset stomach     | <input type="checkbox"/> | <input type="checkbox"/> | <input type="checkbox"/> | <input type="checkbox"/> | <input type="checkbox"/> |
| d) Trouble getting your breath | <input type="checkbox"/> | <input type="checkbox"/> | <input type="checkbox"/> | <input type="checkbox"/> | <input type="checkbox"/> |
| e) Hot or cold spells          | <input type="checkbox"/> | <input type="checkbox"/> | <input type="checkbox"/> | <input type="checkbox"/> | <input type="checkbox"/> |

## SECTION D: HAND AND WRIST FUNCTION

In the ***past 7 days***, have you experienced any pain, tingling (pins and needles) or numbness (loss of sensation) in your **RIGHT** hand or wrist?

**32** Please mark where on your hand/wrist you experienced these symptoms using the key below.

If you do not have any symptoms in your right hand, please move on to Question 34.

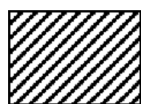

Pain

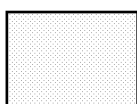

Tingling or numbness

**RIGHT HAND**

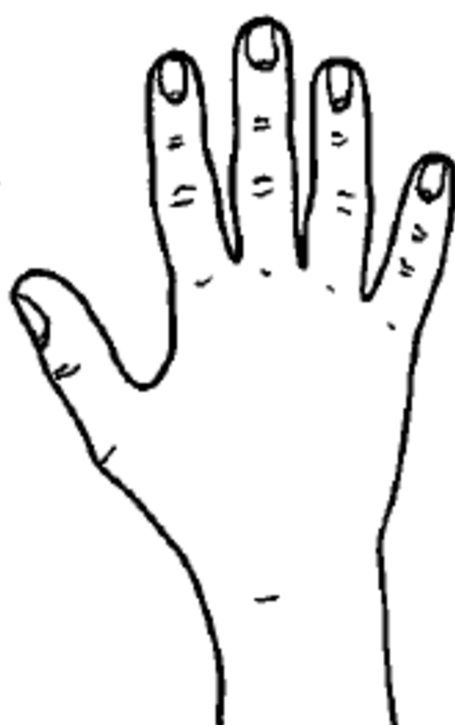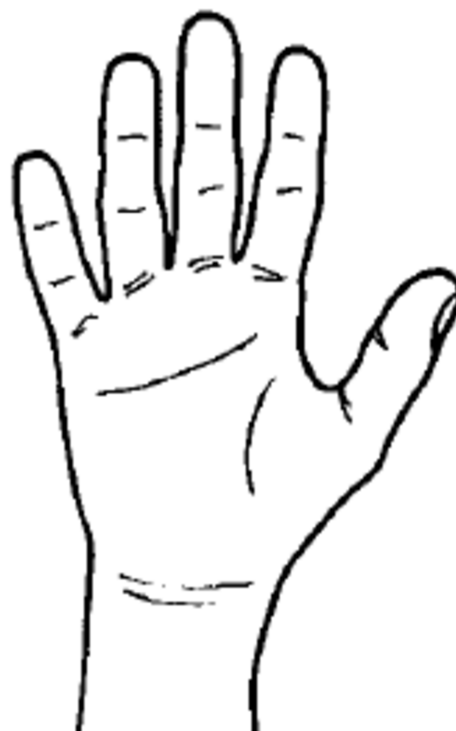

**33** How long ago did the first of these symptoms begin? Please tick one box.

a) Less than 3 months

c) 6 – 12 months

b) 3 – 6 months

d) More than a year

## SECTION D: HAND AND WRIST FUNCTION

In the ***past 7 days***, have you experienced any pain, tingling (pins and needles) or numbness (loss of sensation) in your **LEFT** hand or wrist?

**34** Please mark where on your hand/wrist you experienced these symptoms using the key below.

If you do not have any symptoms in your right hand, please move on to Question 36.

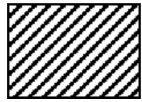

Pain

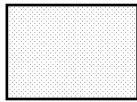

Tingling or numbness

**LEFT HAND**

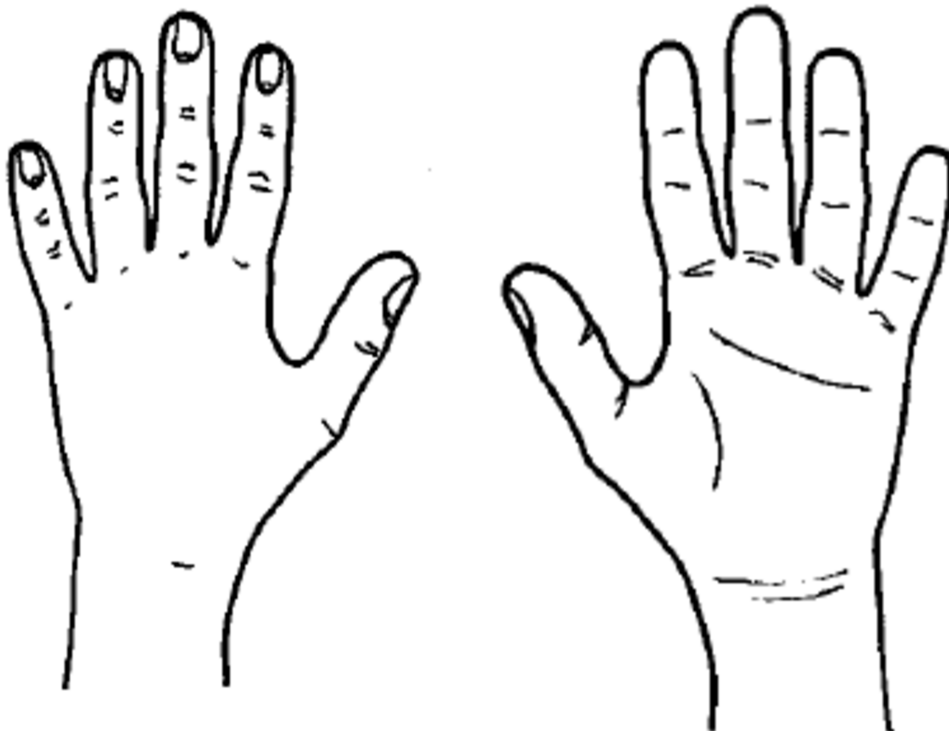

**35** How long ago did the first of these symptoms begin? Please tick one box.

a) Less than 3 months

c) 6 – 12 months

b) 3 – 6 months

d) More than a year

## SECTION D: HAND AND WRIST FUNCTION

**The following questions refer to your symptoms over the *last 7 days*.**

**36** Please answer for each hand, even if you only have problems with one side. Please tick one box for each row.

| <b>36.1 How severe were the following symptoms in your <u>RIGHT</u> hand?</b>               | <b>None</b>              | <b>Mild</b>              | <b>Moderate</b>          | <b>Severe</b>            | <b>Very severe</b>       |
|---------------------------------------------------------------------------------------------|--------------------------|--------------------------|--------------------------|--------------------------|--------------------------|
| a) Pain at night                                                                            | <input type="checkbox"/> | <input type="checkbox"/> | <input type="checkbox"/> | <input type="checkbox"/> | <input type="checkbox"/> |
| b) Pain during the daytime                                                                  | <input type="checkbox"/> | <input type="checkbox"/> | <input type="checkbox"/> | <input type="checkbox"/> | <input type="checkbox"/> |
| c) Numbness or tingling at night                                                            | <input type="checkbox"/> | <input type="checkbox"/> | <input type="checkbox"/> | <input type="checkbox"/> | <input type="checkbox"/> |
| d) Numbness or tingling during the daytime                                                  | <input type="checkbox"/> | <input type="checkbox"/> | <input type="checkbox"/> | <input type="checkbox"/> | <input type="checkbox"/> |
| <b>How often did the following symptoms in your <u>RIGHT</u> hand wake you up at night?</b> | <b>Never</b>             | <b>Once</b>              | <b>2 or 3 times</b>      | <b>4 or 5 times</b>      | <b>More than 5 times</b> |
| e) Pain                                                                                     | <input type="checkbox"/> | <input type="checkbox"/> | <input type="checkbox"/> | <input type="checkbox"/> | <input type="checkbox"/> |
| f) Numbness or tingling                                                                     | <input type="checkbox"/> | <input type="checkbox"/> | <input type="checkbox"/> | <input type="checkbox"/> | <input type="checkbox"/> |
| <b>36.2 How severe were the following symptoms in your <u>LEFT</u> hand?</b>                | <b>None</b>              | <b>Mild</b>              | <b>Moderate</b>          | <b>Severe</b>            | <b>Very severe</b>       |
| a) Pain at night                                                                            | <input type="checkbox"/> | <input type="checkbox"/> | <input type="checkbox"/> | <input type="checkbox"/> | <input type="checkbox"/> |
| b) Pain during the daytime                                                                  | <input type="checkbox"/> | <input type="checkbox"/> | <input type="checkbox"/> | <input type="checkbox"/> | <input type="checkbox"/> |
| c) Numbness or tingling at night                                                            | <input type="checkbox"/> | <input type="checkbox"/> | <input type="checkbox"/> | <input type="checkbox"/> | <input type="checkbox"/> |
| d) Numbness or tingling during the daytime                                                  | <input type="checkbox"/> | <input type="checkbox"/> | <input type="checkbox"/> | <input type="checkbox"/> | <input type="checkbox"/> |
| <b>How often did the following symptoms in your <u>LEFT</u> hand wake you up at night?</b>  | <b>Never</b>             | <b>Once</b>              | <b>2 or 3 times</b>      | <b>4 or 5 times</b>      | <b>More than 5 times</b> |
| e) Pain                                                                                     | <input type="checkbox"/> | <input type="checkbox"/> | <input type="checkbox"/> | <input type="checkbox"/> | <input type="checkbox"/> |
| f) Numbness or tingling                                                                     | <input type="checkbox"/> | <input type="checkbox"/> | <input type="checkbox"/> | <input type="checkbox"/> | <input type="checkbox"/> |

**37** This question refers to the appearance (look) of your hand during the *past 7 days*. Please tick one box for each hand.

|                                                                             | <b>Strongly agree</b>    | <b>Agree</b>             | <b>Neither agree nor disagree</b> | <b>Disagree</b>          | <b>Strongly disagree</b> |
|-----------------------------------------------------------------------------|--------------------------|--------------------------|-----------------------------------|--------------------------|--------------------------|
| a) I am satisfied with the appearance (look) of my <b><u>RIGHT</u></b> hand | <input type="checkbox"/> | <input type="checkbox"/> | <input type="checkbox"/>          | <input type="checkbox"/> | <input type="checkbox"/> |
| b) I am satisfied with the appearance (look) of my <b><u>LEFT</u></b> hand  | <input type="checkbox"/> | <input type="checkbox"/> | <input type="checkbox"/>          | <input type="checkbox"/> | <input type="checkbox"/> |

## SECTION D: HAND AND WRIST FUNCTION

**38** Please answer the following questions on a scale of 0-10, where 0 represents not at all, and 10 represents very much. Please circle one number for each question.

**38.1** Do you think that you will be able to use your hand normally 3 months after the operation?

0      1      2      3      4      5      6      7      8      9      10

**38.2** Are you afraid of having long-term problems with your hand?

0      1      2      3      4      5      6      7      8      9      10

**38.3** Do you blame yourself for your hand problem?

0      1      2      3      4      5      6      7      8      9      10

**38.4** Are your family and friends supportive of your hand problem?

0      1      2      3      4      5      6      7      8      9      10

**39** The following statements describe people's beliefs about their health problems. Please indicate whether you agree or disagree with them in relation to the problems you have with your hand(s) or wrist(s). Please tick the box which most closely reflects how you feel for each statement.

|                                                                                                     | Strongly agree           | Agree                    | Neither agree or disagree | Disagree                 | Strongly Disagree        |
|-----------------------------------------------------------------------------------------------------|--------------------------|--------------------------|---------------------------|--------------------------|--------------------------|
| a) Problems like this run in my family                                                              | <input type="checkbox"/> | <input type="checkbox"/> | <input type="checkbox"/>  | <input type="checkbox"/> | <input type="checkbox"/> |
| b) I think I was born with a weakness or underlying problem in this part of my body                 | <input type="checkbox"/> | <input type="checkbox"/> | <input type="checkbox"/>  | <input type="checkbox"/> | <input type="checkbox"/> |
| c) My problem was caused by work                                                                    | <input type="checkbox"/> | <input type="checkbox"/> | <input type="checkbox"/>  | <input type="checkbox"/> | <input type="checkbox"/> |
| d) Work probably didn't cause my problem, but it made it worse                                      | <input type="checkbox"/> | <input type="checkbox"/> | <input type="checkbox"/>  | <input type="checkbox"/> | <input type="checkbox"/> |
| e) I have a lot of stress in my life and that has made my problem a lot worse                       | <input type="checkbox"/> | <input type="checkbox"/> | <input type="checkbox"/>  | <input type="checkbox"/> | <input type="checkbox"/> |
| f) I think a lack of exercise probably contributed to my problem                                    | <input type="checkbox"/> | <input type="checkbox"/> | <input type="checkbox"/>  | <input type="checkbox"/> | <input type="checkbox"/> |
| g) As you get older, parts of the body start to wear out and problems like mine are likely to occur | <input type="checkbox"/> | <input type="checkbox"/> | <input type="checkbox"/>  | <input type="checkbox"/> | <input type="checkbox"/> |



## SECTION D: HAND AND WRIST FUNCTION

**40** We are interested in the types of thoughts and feelings that you have when you are in pain. The following statements describe different thoughts and feelings that may be associated with pain. Please indicate the degree to which you have these thoughts and feelings when you are experiencing pain. Please tick one box for each statement.

|                                                                 | Not at all               | To a slight degree       | To a moderate degree     | To a great degree        | All of the time          |
|-----------------------------------------------------------------|--------------------------|--------------------------|--------------------------|--------------------------|--------------------------|
| a) I keep thinking about how badly I want the pain to stop      | <input type="checkbox"/> | <input type="checkbox"/> | <input type="checkbox"/> | <input type="checkbox"/> | <input type="checkbox"/> |
| b) It's terrible and I think it's never going to get any better | <input type="checkbox"/> | <input type="checkbox"/> | <input type="checkbox"/> | <input type="checkbox"/> | <input type="checkbox"/> |
| c) I become afraid that the pain may get worse                  | <input type="checkbox"/> | <input type="checkbox"/> | <input type="checkbox"/> | <input type="checkbox"/> | <input type="checkbox"/> |
| d) I anxiously want the pain to go away                         | <input type="checkbox"/> | <input type="checkbox"/> | <input type="checkbox"/> | <input type="checkbox"/> | <input type="checkbox"/> |

The following questions refer to the function of your hands/wrists during the **past 7 days**. Please answer all questions for the right and left sides, even if you do not experience any problems. Please tick one box for each question.

| <b>41 RIGHT SIDE</b>                                          | Very well                | Well                     | Adequately               | Poorly                   | Very poorly              |
|---------------------------------------------------------------|--------------------------|--------------------------|--------------------------|--------------------------|--------------------------|
| a) Overall, how well did your <b>right</b> hand work?         | <input type="checkbox"/> | <input type="checkbox"/> | <input type="checkbox"/> | <input type="checkbox"/> | <input type="checkbox"/> |
| b) How well did your <b>right</b> fingers move?               | <input type="checkbox"/> | <input type="checkbox"/> | <input type="checkbox"/> | <input type="checkbox"/> | <input type="checkbox"/> |
| c) How well did your <b>right</b> wrist move?                 | <input type="checkbox"/> | <input type="checkbox"/> | <input type="checkbox"/> | <input type="checkbox"/> | <input type="checkbox"/> |
|                                                               | Very good                | Good                     | Fair                     | Poor                     | Very poor                |
| d) How was the strength in your <b>right</b> hand?            | <input type="checkbox"/> | <input type="checkbox"/> | <input type="checkbox"/> | <input type="checkbox"/> | <input type="checkbox"/> |
| e) How was the sensation (feeling) in your <b>right</b> hand? | <input type="checkbox"/> | <input type="checkbox"/> | <input type="checkbox"/> | <input type="checkbox"/> | <input type="checkbox"/> |

| <b>42 LEFT SIDE</b>                                          | Very well                | Well                     | Adequately               | Poorly                   | Very poorly              |
|--------------------------------------------------------------|--------------------------|--------------------------|--------------------------|--------------------------|--------------------------|
| a) Overall, how well did your <b>left</b> hand work?         | <input type="checkbox"/> | <input type="checkbox"/> | <input type="checkbox"/> | <input type="checkbox"/> | <input type="checkbox"/> |
| b) How well did your <b>left</b> fingers move?               | <input type="checkbox"/> | <input type="checkbox"/> | <input type="checkbox"/> | <input type="checkbox"/> | <input type="checkbox"/> |
| c) How well did your <b>left</b> wrist move?                 | <input type="checkbox"/> | <input type="checkbox"/> | <input type="checkbox"/> | <input type="checkbox"/> | <input type="checkbox"/> |
|                                                              | Very good                | Good                     | Fair                     | Poor                     | Very poor                |
| d) How was the strength in your <b>left</b> hand?            | <input type="checkbox"/> | <input type="checkbox"/> | <input type="checkbox"/> | <input type="checkbox"/> | <input type="checkbox"/> |
| e) How was the sensation (feeling) in your <b>left</b> hand? | <input type="checkbox"/> | <input type="checkbox"/> | <input type="checkbox"/> | <input type="checkbox"/> | <input type="checkbox"/> |

## SECTION D: HAND AND WRIST FUNCTION

The following questions refer to the ability of your hands to do certain tasks during the ***past 7 days***. If you do not do a certain task, please estimate the difficulty you would have in performing it. Please tick one box for every activity.

### 43 How difficult was it for you to perform the following activities using your RIGHT HAND?

|                          | Not at all<br>difficult  | A little<br>difficult    | Somewhat<br>difficult    | Moderately<br>difficult  | Very<br>difficult        |
|--------------------------|--------------------------|--------------------------|--------------------------|--------------------------|--------------------------|
| a) Turn a door knob      | <input type="checkbox"/> | <input type="checkbox"/> | <input type="checkbox"/> | <input type="checkbox"/> | <input type="checkbox"/> |
| b) Pick up a coin        | <input type="checkbox"/> | <input type="checkbox"/> | <input type="checkbox"/> | <input type="checkbox"/> | <input type="checkbox"/> |
| c) Hold a glass of water | <input type="checkbox"/> | <input type="checkbox"/> | <input type="checkbox"/> | <input type="checkbox"/> | <input type="checkbox"/> |
| d) Turn a key in a lock  | <input type="checkbox"/> | <input type="checkbox"/> | <input type="checkbox"/> | <input type="checkbox"/> | <input type="checkbox"/> |
| e) Hold a frying pan     | <input type="checkbox"/> | <input type="checkbox"/> | <input type="checkbox"/> | <input type="checkbox"/> | <input type="checkbox"/> |

### 44 How difficult was it for you to perform the following activities using your LEFT HAND?

|                          | Not at all<br>difficult  | A little<br>difficult    | Somewhat<br>difficult    | Moderately<br>difficult  | Very<br>difficult        |
|--------------------------|--------------------------|--------------------------|--------------------------|--------------------------|--------------------------|
| a) Turn a door knob      | <input type="checkbox"/> | <input type="checkbox"/> | <input type="checkbox"/> | <input type="checkbox"/> | <input type="checkbox"/> |
| b) Pick up a coin        | <input type="checkbox"/> | <input type="checkbox"/> | <input type="checkbox"/> | <input type="checkbox"/> | <input type="checkbox"/> |
| c) Hold a glass of water | <input type="checkbox"/> | <input type="checkbox"/> | <input type="checkbox"/> | <input type="checkbox"/> | <input type="checkbox"/> |
| d) Turn a key in a lock  | <input type="checkbox"/> | <input type="checkbox"/> | <input type="checkbox"/> | <input type="checkbox"/> | <input type="checkbox"/> |
| e) Hold a frying pan     | <input type="checkbox"/> | <input type="checkbox"/> | <input type="checkbox"/> | <input type="checkbox"/> | <input type="checkbox"/> |

### 45 How difficult was it for you to perform the following activities using BOTH HANDS?

|                          | Not at all<br>difficult  | A little<br>difficult    | Somewhat<br>difficult    | Moderately<br>difficult  | Very<br>difficult        |
|--------------------------|--------------------------|--------------------------|--------------------------|--------------------------|--------------------------|
| a) Open a jar            | <input type="checkbox"/> | <input type="checkbox"/> | <input type="checkbox"/> | <input type="checkbox"/> | <input type="checkbox"/> |
| b) Button a shirt/blouse | <input type="checkbox"/> | <input type="checkbox"/> | <input type="checkbox"/> | <input type="checkbox"/> | <input type="checkbox"/> |
| c) Eat with a knife/fork | <input type="checkbox"/> | <input type="checkbox"/> | <input type="checkbox"/> | <input type="checkbox"/> | <input type="checkbox"/> |
| d) Carry a grocery bag   | <input type="checkbox"/> | <input type="checkbox"/> | <input type="checkbox"/> | <input type="checkbox"/> | <input type="checkbox"/> |
| e) Wash dishes           | <input type="checkbox"/> | <input type="checkbox"/> | <input type="checkbox"/> | <input type="checkbox"/> | <input type="checkbox"/> |
| f) Wash your hair        | <input type="checkbox"/> | <input type="checkbox"/> | <input type="checkbox"/> | <input type="checkbox"/> | <input type="checkbox"/> |
| g) Tie shoelaces/knots   | <input type="checkbox"/> | <input type="checkbox"/> | <input type="checkbox"/> | <input type="checkbox"/> | <input type="checkbox"/> |

## SECTION D: HAND AND WRIST FUNCTION

The following questions refer to your satisfaction with your hands/wrists during the ***past 7 days***. Please tick one box for each question

### 46 How satisfied were you with your **RIGHT** hand/wrist during the ***past 7 days***?

| RIGHT HAND                          | Very satisfied           | Somewhat satisfied       | Neither satisfied or dissatisfied | Somewhat dissatisfied    | Very dissatisfied        |
|-------------------------------------|--------------------------|--------------------------|-----------------------------------|--------------------------|--------------------------|
| a) Overall function of your hand    | <input type="checkbox"/> | <input type="checkbox"/> | <input type="checkbox"/>          | <input type="checkbox"/> | <input type="checkbox"/> |
| b) Movement of the fingers          | <input type="checkbox"/> | <input type="checkbox"/> | <input type="checkbox"/>          | <input type="checkbox"/> | <input type="checkbox"/> |
| c) Movement of your wrist           | <input type="checkbox"/> | <input type="checkbox"/> | <input type="checkbox"/>          | <input type="checkbox"/> | <input type="checkbox"/> |
| d) Strength of your hand            | <input type="checkbox"/> | <input type="checkbox"/> | <input type="checkbox"/>          | <input type="checkbox"/> | <input type="checkbox"/> |
| e) Pain level of your hand          | <input type="checkbox"/> | <input type="checkbox"/> | <input type="checkbox"/>          | <input type="checkbox"/> | <input type="checkbox"/> |
| f) Sensation (feeling) of your hand | <input type="checkbox"/> | <input type="checkbox"/> | <input type="checkbox"/>          | <input type="checkbox"/> | <input type="checkbox"/> |

### 47 How satisfied were you with your **LEFT** hand/wrist during the ***past 7 days***?

| LEFT HAND                           | Very satisfied           | Somewhat satisfied       | Neither satisfied or dissatisfied | Somewhat dissatisfied    | Very dissatisfied        |
|-------------------------------------|--------------------------|--------------------------|-----------------------------------|--------------------------|--------------------------|
| a) Overall function of your hand    | <input type="checkbox"/> | <input type="checkbox"/> | <input type="checkbox"/>          | <input type="checkbox"/> | <input type="checkbox"/> |
| b) Movement of the fingers          | <input type="checkbox"/> | <input type="checkbox"/> | <input type="checkbox"/>          | <input type="checkbox"/> | <input type="checkbox"/> |
| c) Movement of your wrist           | <input type="checkbox"/> | <input type="checkbox"/> | <input type="checkbox"/>          | <input type="checkbox"/> | <input type="checkbox"/> |
| d) Strength of your hand            | <input type="checkbox"/> | <input type="checkbox"/> | <input type="checkbox"/>          | <input type="checkbox"/> | <input type="checkbox"/> |
| e) Pain level of your hand          | <input type="checkbox"/> | <input type="checkbox"/> | <input type="checkbox"/>          | <input type="checkbox"/> | <input type="checkbox"/> |
| f) Sensation (feeling) of your hand | <input type="checkbox"/> | <input type="checkbox"/> | <input type="checkbox"/>          | <input type="checkbox"/> | <input type="checkbox"/> |

**Thank you for completing this questionnaire!**  
**Please return it to the REACTS team**  
**using the pre-paid envelope.**

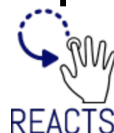

If you have any questions, or would like any additional information, please contact  
 Lisa Newington on:

[ln@mrc.soton.ac.uk](mailto:ln@mrc.soton.ac.uk) | 023 8077 7624 | 07866 997732
