# Supplementary material
Source: HighWire-hosted journal article supplement (https://bmjopen.bmj.com/content/11/2/e041656)
Supplement: inline-supplementary-material-4 [file inline-supplementary-material-4.pdf]

## SUPPLEMENTARY TABLES

## 1. Cox proportional hazards univariate analyses of the association between demographic and general health factors and the duration of work absence after carpal tunnel release (non-significant findings)

|                                                                                                              | N   | Median time to return to work (days) | Inter quartile range | Hazards ratio <sup>1</sup> | 95% Confidence intervals | P value |
|--------------------------------------------------------------------------------------------------------------|-----|--------------------------------------|----------------------|----------------------------|--------------------------|---------|
| <i>Body mass index (kg/m<sup>2</sup>) (censored 1 normal, 1 overweight, 2 obese; 13 missing)</i>             |     |                                      |                      |                            |                          |         |
| Normal (18.5-24.9)                                                                                           | 47  | 20                                   | 12-33                | 1                          | -                        | -       |
| Over (25.0-29.9)                                                                                             | 64  | 19                                   | 12.5-29              | 0.98                       | 0.65, 1.46               | 0.91    |
| Obese (≥30)                                                                                                  | 67  | 21                                   | 10-40                | 0.88                       | 0.60, 1.28               | 0.50    |
| <i>Surgery to dominant hand <sup>2</sup> (censored 3 yes, 2 no; no missing data)</i>                         |     |                                      |                      |                            |                          |         |
| Yes                                                                                                          | 128 | 19.5                                 | 12-33                | 1                          | -                        | -       |
| No                                                                                                           | 62  | 22                                   | 12-35                | 0.83                       | 0.61, 1.14               | 0.25    |
| <i>General health status (censored 5 excellent; 1 missing)</i>                                               |     |                                      |                      |                            |                          |         |
| Excellent/very good/ good                                                                                    | 165 | 19                                   | 12-32                | 1                          | -                        | -       |
| Fair/poor                                                                                                    | 24  | 28.5                                 | 12.5-42              | 0.74                       | 0.47, 1.16               | 0.19    |
| <i>Number of comorbidities <sup>3</sup> (censored 3 none, 1 one; 1 missing)</i>                              |     |                                      |                      |                            |                          |         |
| None                                                                                                         | 49  | 18                                   | 7-32                 | 1                          | -                        | -       |
| One                                                                                                          | 67  | 24                                   | 14-42                | 0.87                       | 0.59, 1.27               | 0.47    |
| Two or more                                                                                                  | 74  | 19.5                                 | 10-29                | 1.11                       | 0.76, 1.62               | 0.60    |
| <i>Number of disability comorbidities <sup>3</sup> (censored 3 none, 2 one; no missing data)</i>             |     |                                      |                      |                            |                          |         |
| None                                                                                                         | 130 | 19                                   | 9-33                 | 1                          | -                        | -       |
| One                                                                                                          | 39  | 26                                   | 13-31                | 0.75                       | 0.52, 1.08               | 0.12    |
| Two or more                                                                                                  | 21  | 20                                   | 14-31                | 0.81                       | 0.50, 1.32               | 0.40    |
| <i>Number of somatising symptoms <sup>4</sup> (censored 1 none, 1 one, 3 two or more; 1 missing)</i>         |     |                                      |                      |                            |                          |         |
| None                                                                                                         | 96  | 19                                   | 10.5-35              | 1                          | -                        | -       |
| One                                                                                                          | 51  | 22                                   | 13-34                | 0.98                       | 0.70, 1.38               | 0.91    |
| Two or more                                                                                                  | 42  | 19.5                                 | 14-31                | 0.84                       | 0.58, 1.22               | 0.36    |
| <i>SF36 Mental health score (tertiles) <sup>5</sup> (censored 2 poor, 1 intermediate, 2 good; 2 missing)</i> |     |                                      |                      |                            |                          |         |
| Poor (22.2-57.8)                                                                                             | 60  | 24                                   | 16-39                | 0.71                       | 0.50, 1.03               | 0.07    |
| Intermediate (60.0-75.6)                                                                                     | 68  | 18.5                                 | 11-36.5              | 0.88                       | 0.62, 1.25               | 0.48    |
| Good (77.8-97.8)                                                                                             | 60  | 16.5                                 | 7-30                 | 1                          | -                        | -       |

Total sample size n=195. Median duration of work absence relates to the 190 non-censored events.

<sup>1</sup>. Adjusted for age and sex.

<sup>2</sup>. Considered and the non-dominant hand for those who reported ambidexterity (n=4) and dominant hand for those undergoing simultaneous bilateral surgery (n=2).

<sup>3</sup>. Adapted from the self-administered co-morbidity questionnaire [1].

<sup>4</sup>. Adapted from the four-dimensional symptom questionnaire [2].

<sup>5</sup>. Taken from the SF-36 with data-driven tertiles [3].

## 2. Cox proportional hazards univariate analyses of the association between health beliefs and the duration of work absence after carpal tunnel release (non-significant findings)

|                                                                                                                        | N   | Median time to return to work (days) | Inter quartile range | Hazards ratio <sup>1</sup> | 95% Confidence intervals | P value |
|------------------------------------------------------------------------------------------------------------------------|-----|--------------------------------------|----------------------|----------------------------|--------------------------|---------|
| <i>Believe will be unable to use hand normally in 3 months <sup>2</sup> (censored 5 no; 2 missing)</i>                 |     |                                      |                      |                            |                          |         |
| No                                                                                                                     | 168 | 20                                   | 12-32.5              | 1                          | -                        | -       |
| Yes                                                                                                                    | 20  | 20.5                                 | 14.5-40              | 1.04                       | 0.65, 1.67               | 0.87    |
| <i>Blames self for hand problem <sup>2</sup> (censored 5 no; 2 missing)</i>                                            |     |                                      |                      |                            |                          |         |
| No                                                                                                                     | 162 | 20                                   | 12-35                | 1                          | -                        | -       |
| Yes                                                                                                                    | 26  | 22                                   | 14-31                | 1.08                       | 0.70, 1.66               | 0.73    |
| <i>Lack of support from family/friends <sup>2</sup> (censored 4 no, 1 yes; 2 missing)</i>                              |     |                                      |                      |                            |                          |         |
| No                                                                                                                     | 156 | 20                                   | 12-32.5              | 1                          | -                        | -       |
| Yes                                                                                                                    | 32  | 19.5                                 | 13-40                | 0.88                       | 0.60, 1.29               | 0.51    |
| <i>Problem runs in the family/born with a weakness <sup>3</sup> (censored 3 no, 2 agree/strongly agree; 2 missing)</i> |     |                                      |                      |                            |                          |         |
| No                                                                                                                     | 134 | 20                                   | 12-35                | 1                          | -                        | -       |
| Agree/strongly agree                                                                                                   | 54  | 23                                   | 12-31                | 0.88                       | 0.63, 1.21               | 0.42    |
| <i>Stress made the problem worse <sup>3</sup> (censored 5 no; 2 missing)</i>                                           |     |                                      |                      |                            |                          |         |
| No                                                                                                                     | 169 | 20                                   | 12-33                | 1                          | -                        | -       |
| Agree/strongly agree                                                                                                   | 19  | 28                                   | 14-40                | 0.79                       | 0.48, 1.28               | 0.33    |
| <i>Lack of exercise contributed to the problem <sup>3</sup> (censored 5 no; 2 missing)</i>                             |     |                                      |                      |                            |                          |         |
| No                                                                                                                     | 172 | 20                                   | 13-33                | 1                          | -                        | -       |
| Agree/strongly agree                                                                                                   | 16  | 15                                   | 10.5-34.5            | 1.23                       | 0.73, 2.06               | 0.43    |
| <i>Getting older contributes to the problem <sup>3</sup> (censored 3 no, 2 yes; 3 missing)</i>                         |     |                                      |                      |                            |                          |         |
| No                                                                                                                     | 79  | 26                                   | 14-42                | 1                          | -                        | -       |
| Agree/strongly agree                                                                                                   | 108 | 16                                   | 10-29                | 1.28                       | 0.94, 1.74               | 0.11    |
| <i>Work probably didn't cause the problem, but made it worse <sup>3</sup> (censored 2 no, 3 yes; 4 missing)</i>        |     |                                      |                      |                            |                          |         |
| No                                                                                                                     | 100 | 20.5                                 | 12-35                | 1                          | -                        | -       |
| Agree/strongly agree                                                                                                   | 86  | 19.5                                 | 13-31                | 1.01                       | 0.75, 1.35               | 0.95    |
| <i>Pain catastrophisation to at least a moderate degree <sup>4</sup> (censored 3 no, 2 yes; missing 2)</i>             |     |                                      |                      |                            |                          |         |
| No                                                                                                                     | 133 | 19                                   | 10-33                | 1                          | -                        | -       |
| Yes                                                                                                                    | 55  | 22                                   | 15-31                | 0.81                       | 0.59, 1.12               | 0.21    |

Total sample size n=195. Median duration of work absence relates to the 190 non-censored events.

<sup>1</sup>. Adjusted for age and sex.

<sup>2</sup>. Reported on a 0-10 scale and dichotomised to no (0-6) and yes (7-10) [4].

<sup>3</sup>. Reported on a 5-point scale and dichotomised to agree/strongly agree and neither agree nor disagree/disagree/disagree strongly [5].

<sup>4</sup>. Pain catastrophizing scale dichotomised to those who reported catastrophising pain thoughts and feelings to at least a moderate degree in response to all questions and those who did not [6].

### 3. Cox proportional hazards univariate analyses of the association between clinical and surgical factors and the duration of work absence after carpal tunnel release (non-significant findings)

|                                                                                                                                   | N   | Median time to return to work (days) | Inter quartile range | Hazards ratio <sup>1</sup> | 95% Confidence intervals | P value |
|-----------------------------------------------------------------------------------------------------------------------------------|-----|--------------------------------------|----------------------|----------------------------|--------------------------|---------|
| <i>Katz hand diagram score for side of surgery</i> <sup>2</sup> (censored 3 classic/probable, 2 possible/unlikely; 4 missing)     |     |                                      |                      |                            |                          |         |
| Classic/probable                                                                                                                  | 126 | 22                                   | 14-38                | 1                          | -                        | -       |
| Possible/unlikely                                                                                                                 | 60  | 16.5                                 | 9.5-30.5             | 1.10                       | 0.81, 1.51               | 0.54    |
| <i>Duration of symptoms</i> (censored 1 ≤ 1 year, 4 > 1 year; 2 missing)                                                          |     |                                      |                      |                            |                          |         |
| ≤ 1 year                                                                                                                          | 47  | 19                                   | 10-31                | 1                          | -                        | -       |
| > 1 year                                                                                                                          | 141 | 20                                   | 13-34                | 0.86                       | 0.62, 1.21               | 0.38    |
| <i>Nerve conduction studies performed</i> (censored 3 no, 2 yes; 40 missing)                                                      |     |                                      |                      |                            |                          |         |
| No                                                                                                                                | 71  | 21                                   | 14-35                | 1                          | -                        | -       |
| Yes                                                                                                                               | 79  | 20                                   | 11-33                | 1.14                       | 0.83, 1.58               | 0.41    |
| <i>Type of suture material</i> (censored 4 non-absorbable; 49 missing)                                                            |     |                                      |                      |                            |                          |         |
| Non-absorbable                                                                                                                    | 119 | 21                                   | 12-38                | 1                          | -                        | -       |
| Absorbable                                                                                                                        | 23  | 20                                   | 13-29                | 1.15                       | 0.73, 1.83               | 0.55    |
| <i>MHQ function score for side of surgery</i> (tertiles) <sup>3</sup> (censored 3 poor, 1 intermediate, 1 good; 2 missing)        |     |                                      |                      |                            |                          |         |
| Poor (0-40)                                                                                                                       | 79  | 20                                   | 13-41                | 0.80                       | 0.57, 1.12               | 0.19    |
| Intermediate (44-55)                                                                                                              | 48  | 19.5                                 | 13.5-33              | 0.81                       | 0.55, 1.19               | 0.29    |
| Good (60-100)                                                                                                                     | 61  | 20                                   | 7-29                 | 1                          | -                        | -       |
| <i>MHQ bilateral activities of daily living score</i> (tertiles) <sup>3</sup> (censored 1 poor, 4 intermediate; 1 missing)        |     |                                      |                      |                            |                          |         |
| Poor (0-61)                                                                                                                       | 72  | 19                                   | 12.5-33.5            | 0.96                       | 0.66, 1.38               | 0.81    |
| Intermediate (64-82)                                                                                                              | 55  | 21                                   | 13-38                | 0.70                       | 0.49, 1.01               | 0.06    |
| Good (83-100)                                                                                                                     | 62  | 20                                   | 10-31                | 1                          | -                        | -       |
| <i>MHQ activities of daily living score, side of surgery</i> (tertiles) <sup>3</sup> (censored 2 poor, 3 intermediate; 1 missing) |     |                                      |                      |                            |                          |         |
| Poor (0-55)                                                                                                                       | 63  | 20                                   | 12-42                | 0.81                       | 0.56, 1.18               | 0.27    |
| Intermediate (58-80)                                                                                                              | 63  | 20                                   | 14-35                | 0.86                       | 0.61, 1.23               | 0.42    |
| Good (85-100)                                                                                                                     | 63  | 20                                   | 9-32                 | 1                          | -                        | -       |
| <i>MHQ satisfaction score for side of surgery</i> (tertiles) <sup>3</sup> (censored 3 poor, 2 intermediate; no missing data)      |     |                                      |                      |                            |                          |         |
| Poor (0-25)                                                                                                                       | 88  | 21.5                                 | 13-42                | 0.78                       | 0.55, 1.11               | 0.16    |
| Intermediate (29-50)                                                                                                              | 49  | 18                                   | 14-29                | 0.87                       | 0.59, 1.28               | 0.48    |
| Good (54-100)                                                                                                                     | 53  | 20                                   | 9-31                 | 1                          | -                        | -       |
| <i>Satisfaction with appearance for side of surgery</i> <sup>4</sup> (censored 2 satisfied, 3 dissatisfied; 1 missing)            |     |                                      |                      |                            |                          |         |
| Satisfied                                                                                                                         | 136 | 20                                   | 10.5-31.5            | 1                          | -                        | -       |
| Dissatisfied                                                                                                                      | 53  | 20                                   | 13-40                | 0.84                       | 0.61, 1.16               | 0.29    |

Total sample size n=195. Median duration of work absence relates to the 190 non-censored events.

<sup>1</sup>. Adjusted for age and sex.

<sup>2</sup>. Adapted from Calfee et al. [7].

<sup>3</sup>. Michigan Hand Questionnaire [8]. Data-driven tertiles.

<sup>4</sup>. Reported on a 5-point scale in response to the statement: I am satisfied with the appearance (look) of my hand. Dichotomised as satisfied (strongly agree/agree) and dissatisfied (neither agree nor disagree, disagree, strongly disagree).

#### 4. Cox proportional hazards univariate analyses of the association between occupational factors and the duration of work absence after carpal tunnel release (non-significant findings)

|                                                                                                            | N   | Median time to return to work (days) | Inter quartile range | Hazards ratio <sup>1</sup> | 95% Confidence intervals | P value |
|------------------------------------------------------------------------------------------------------------|-----|--------------------------------------|----------------------|----------------------------|--------------------------|---------|
| <i>Have more than one paid job (censored 4 no, 1 yes; 1 missing)</i>                                       |     |                                      |                      |                            |                          |         |
| No                                                                                                         | 177 | 20                                   | 12-32                | 1                          | -                        | -       |
| Yes                                                                                                        | 12  | 26.5                                 | 19-42                | 0.61                       | 0.34, 1.11               | 0.11    |
| <i>Total paid work hours per week <sup>2</sup> (censored 4 ≤37.5, 1 &gt;37.5; no missing data)</i>         |     |                                      |                      |                            |                          |         |
| ≤37.5                                                                                                      | 97  | 22                                   | 15-38                | 1                          | -                        | -       |
| >37.5                                                                                                      | 93  | 16                                   | 6-29                 | 1.25                       | 0.88, 1.79               | 0.21    |
| <i>Number of work days per week (censored 1 &lt;5, 4 5; no missing data)</i>                               |     |                                      |                      |                            |                          |         |
| <5                                                                                                         | 55  | 23                                   | 15-35                | 1                          | 0.72, 1.39               | 0.98    |
| 5                                                                                                          | 116 | 19                                   | 10.5-33              | 1                          | -                        | -       |
| >5                                                                                                         | 19  | 13                                   | 6-31                 | 1.28                       | 0.77, 2.14               | 0.34    |
| <i>Sick leave taken for this problem in the last month (censored 5 no; 16 missing)</i>                     |     |                                      |                      |                            |                          |         |
| No                                                                                                         | 154 | 20                                   | 12-33                | 1                          | -                        | -       |
| Yes                                                                                                        | 20  | 15                                   | 9.5-30               | 0.99                       | 0.61, 1.60               | 0.95    |
| <i>Sick leave taken for another problem in the last month (censored 4 no, 1 yes; 20 missing)</i>           |     |                                      |                      |                            |                          |         |
| No                                                                                                         | 152 | 19                                   | 10.5-31              | 1                          | -                        | -       |
| Yes                                                                                                        | 18  | 30                                   | 21-42                | 0.67                       | 0.41, 1.09               | 0.10    |
| <i>Received advice about return to work after surgery (censored 5 yes; 3 missing)</i>                      |     |                                      |                      |                            |                          |         |
| Yes                                                                                                        | 134 | 19                                   | 12-31                | 1                          | -                        | -       |
| No                                                                                                         | 53  | 22                                   | 14-41                | 0.92                       | 0.67, 1.27               | 0.61    |
| <i>Required to work to tight deadlines <sup>3</sup> (censored 3 no, 2 yes; missing 3)</i>                  |     |                                      |                      |                            |                          |         |
| No                                                                                                         | 75  | 23                                   | 14-40                | 1                          | -                        | -       |
| Yes                                                                                                        | 112 | 18                                   | 9.5-31               | 1.19                       | 0.89, 1.61               | 0.24    |
| <i>Use power tools that make the hand/arm vibrate <sup>3</sup> (censored 5 no; missing 7)</i>              |     |                                      |                      |                            |                          |         |
| No                                                                                                         | 145 | 19                                   | 12-32                | 1                          | -                        | -       |
| Yes                                                                                                        | 38  | 22                                   | 14-42                | 0.68                       | 0.44, 1.05               | 0.08    |
| <i>Work with hands above shoulder height for &gt;1 hour <sup>3</sup> (censored 4 no, 1 yes; missing 9)</i> |     |                                      |                      |                            |                          |         |
| No                                                                                                         | 147 | 20                                   | 12-33                | 1                          | -                        | -       |
| Yes                                                                                                        | 34  | 19.5                                 | 13-33                | 0.89                       | 0.60, 1.32               | 0.56    |
| <i>Work with neck bent forward for &gt;2 hours <sup>3</sup> (censored 3 no, 2 yes; missing 3)</i>          |     |                                      |                      |                            |                          |         |
| No                                                                                                         | 114 | 21                                   | 13-39                | 1                          | -                        | -       |
| Yes                                                                                                        | 73  | 18                                   | 8-31                 | 1.19                       | 0.88, 1.60               | 0.26    |
| <i>Work with neck twisted for &gt;30 minutes <sup>3</sup> (censored 4 no, 1 yes; missing 7)</i>            |     |                                      |                      |                            |                          |         |
| No                                                                                                         | 136 | 20                                   | 12-34                | 1                          | -                        | -       |
| Yes                                                                                                        | 47  | 22                                   | 13-32                | 0.93                       | 0.66, 1.32               | 0.70    |
| <i>Drive for &gt;1 hour per day <sup>3</sup> (censored 5 no; missing 5)</i>                                |     |                                      |                      |                            |                          |         |
| No                                                                                                         | 115 | 21                                   | 13-38                | 1                          | -                        | -       |
| Yes                                                                                                        | 70  | 16                                   | 7-31                 | 1.22                       | 0.88, 1.68               | 0.24    |

Total sample size n=195. Median duration of work absence relates to the 190 non-censored events.

<sup>1</sup>. Adjusted for age and sex.

<sup>2</sup>. Dichotomised by the median for the sample population

<sup>3</sup>. As part of the normal working day [9].

## References

1. Sangha O, Stucki G, Liang MH et al. The self-administered comorbidity questionnaire: a new method to assess comorbidity for clinical and health services research *Arthritis & Rheumatism* 2003;49(2):156-63.
2. Terluin B, van Marwijk HW, Adèr HJ et al. The Four-Dimensional Symptom Questionnaire (4DSQ): a validation study of a multidimensional self-report questionnaire to assess distress, depression, anxiety and somatization. *BMC Psychiatry* 2006;6(1):34.
3. Ware J, Sherbourne C. The MOS 36-item short-form health survey (SF-36): I. conceptual framework and item selection. *Medical Care* 1992;30:473-83.
4. Hansen TB, Dalsgaard J, Meldgaard A et al. A prospective study of prognostic factors for duration of sick leave after endoscopic carpal tunnel release. *BMC Musculoskelet Disord* 2009;10:144.
5. Palmer K, Calnan M, Wainwright D et al. Upper limb pain in primary care: health beliefs, somatic distress, consulting and patient satisfaction. *Family Practice* 2006;23(6):609-17.
6. Bot AG, Becker SJ, Bruijnzeel H et al. Creation of the abbreviated measures of the Pain Catastrophizing Scale and the Short Health Anxiety Inventory: the PCS-4 and SHAI-5. *J Musculoskelet Pain* 2014;22(2):145-51.
7. Calfee RP, Dale AM, Ryan D et al. Performance of simplified scoring systems for hand diagrams in carpal tunnel syndrome screening. *J Hand Surg Am* 2012;37(1):10-17.
8. University of Michigan Medical School. The Michigan Hand Questionnaire: <http://mhq.lab.medicine.umich.edu/>. Accessed 04/04/2019.
9. Karasek R, Brisson C, Kawakami N et al. The Job Content Questionnaire (JCQ): an instrument for internationally comparative assessments of psychosocial job characteristics. *J Occup Health Psychol* 1998;3(4):322-55.
